# Supplementary material for: 20-Year Nationwide Follow-Up Study on Discontinuation of Antipsychotic Treatment in First-Episode Schizophrenia
Source: Atypon-hosted journal article supplement (doi:10.1176/appi.ajp.2018.17091001), 2018-04-06
Supplement: appi.ajp.2018.17091001.ds001.pdf [file appi.ajp.2018.17091001.ds001.pdf]

**FIGURE S1.** Formation of the discontinuation cohort and matching with users and non-users at the time of discontinuation.

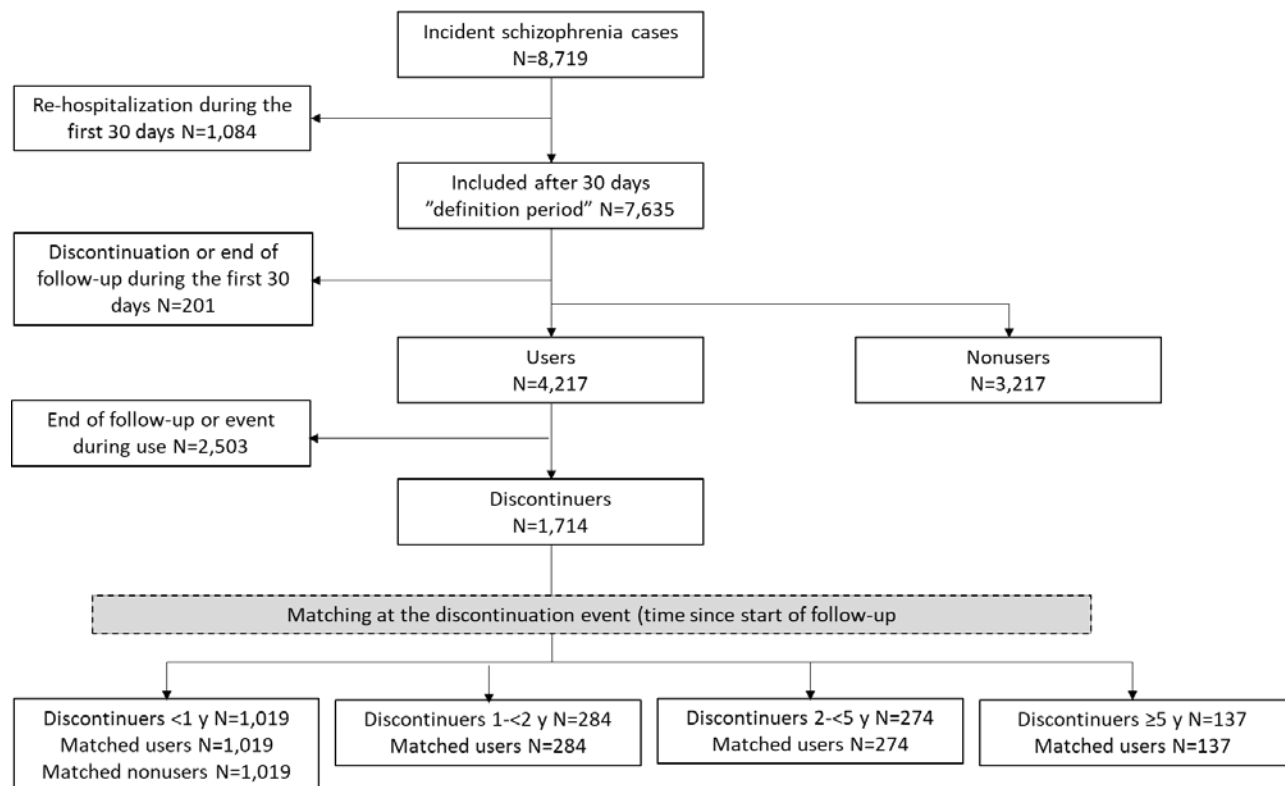

**FIGURE S2.** Study design for identification of discontinuers and their matched persons.

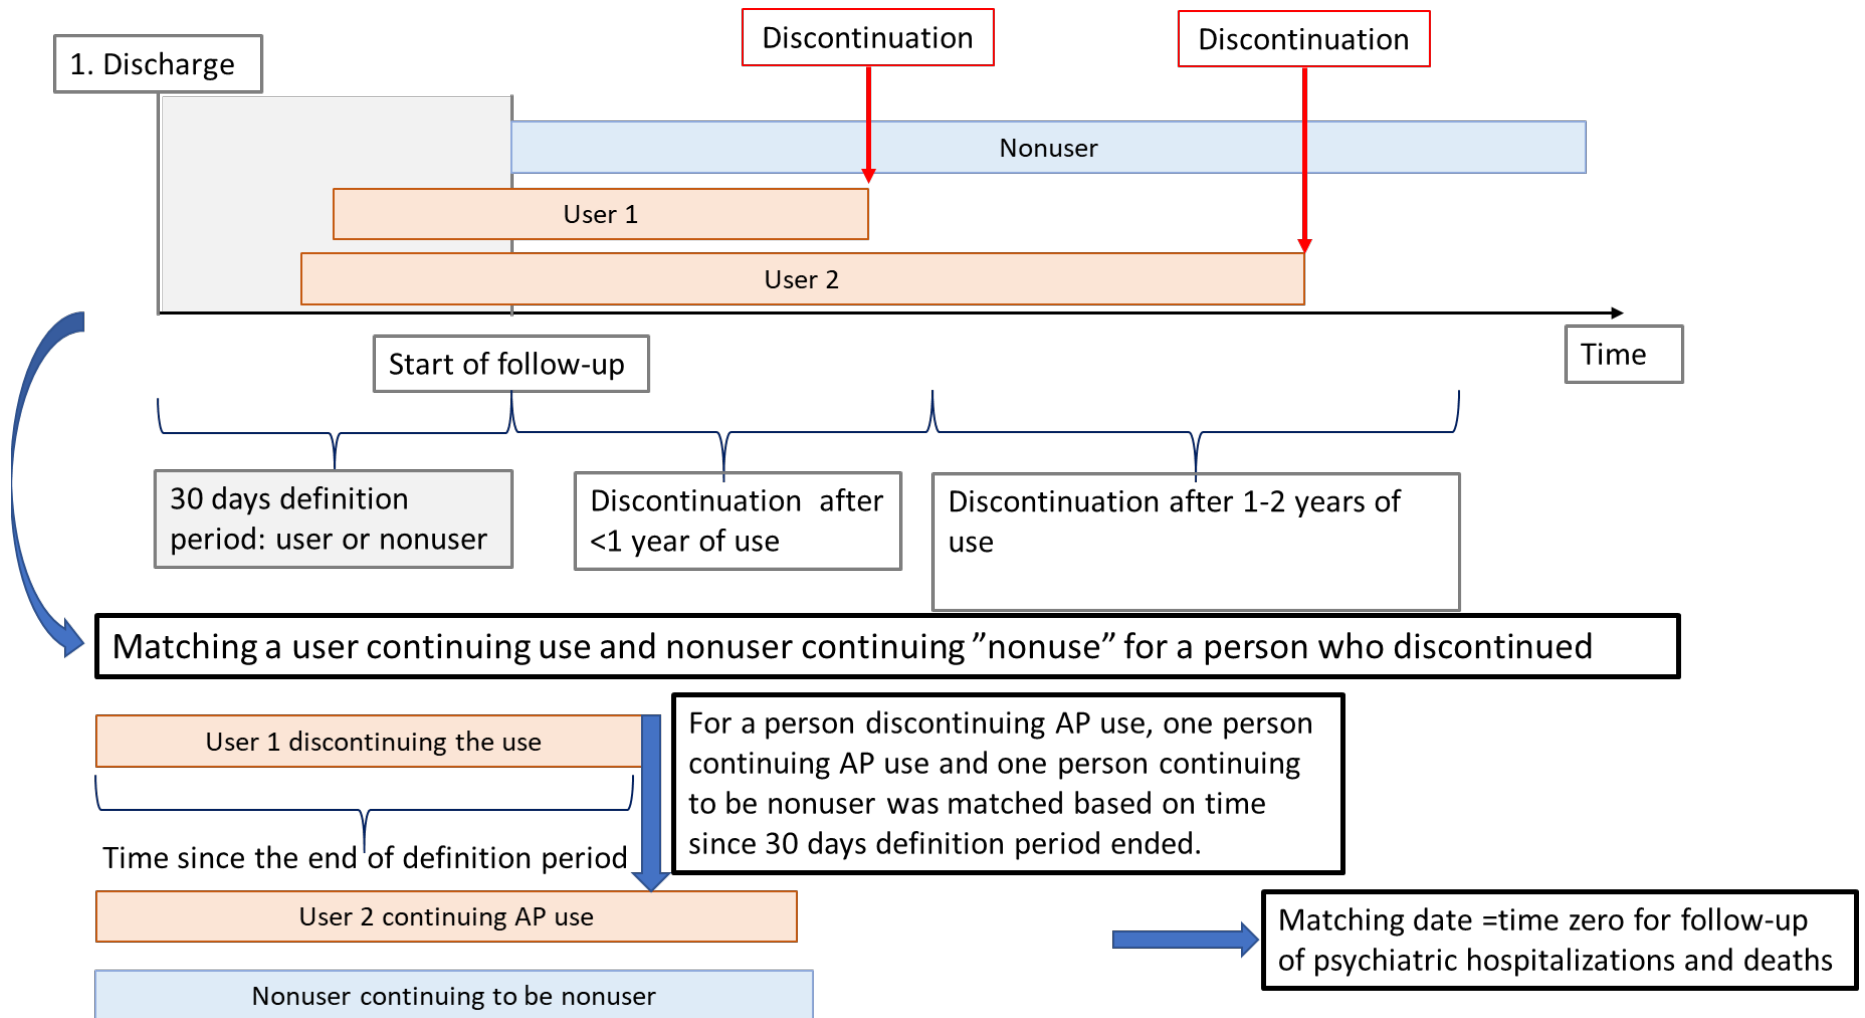

**FIGURE S3.** The Kaplan-Meier curves for treatment failure (psychiatric re-hospitalization or death) among 4 discontinuation groups when the whole incident cohort is included (N = 23,499, without washout period for antipsychotic use). The hazard ratios and 95% confidence intervals are shown in Supplementary Table 1.

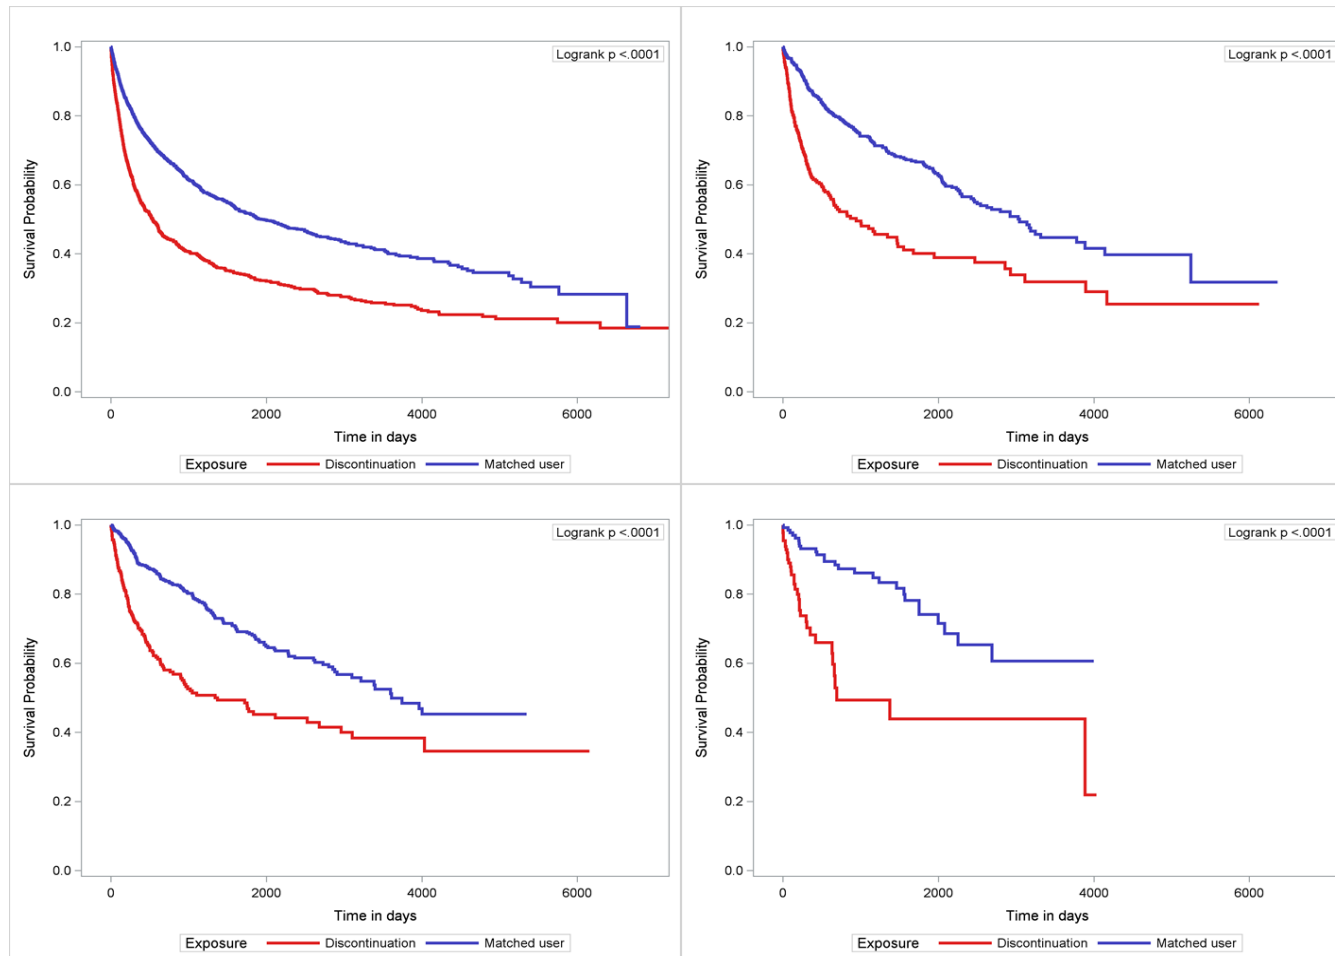

a) Discontinuation within <1 year of use, b) discontinuation after 1-<2 years of use, c) discontinuation after 2-<5 years of use, and d) discontinuation after ≥5 years of use (median 8.7 years, IQR 6.6–11.6 years).

**FIGURE S4.** Risk of re-hospitalization outcome for discontinuation groups when the whole incident cohort is included (N = 23,499, without washout period for antipsychotic use). The hazard ratios and number of events and patient years are shown in Table S3.

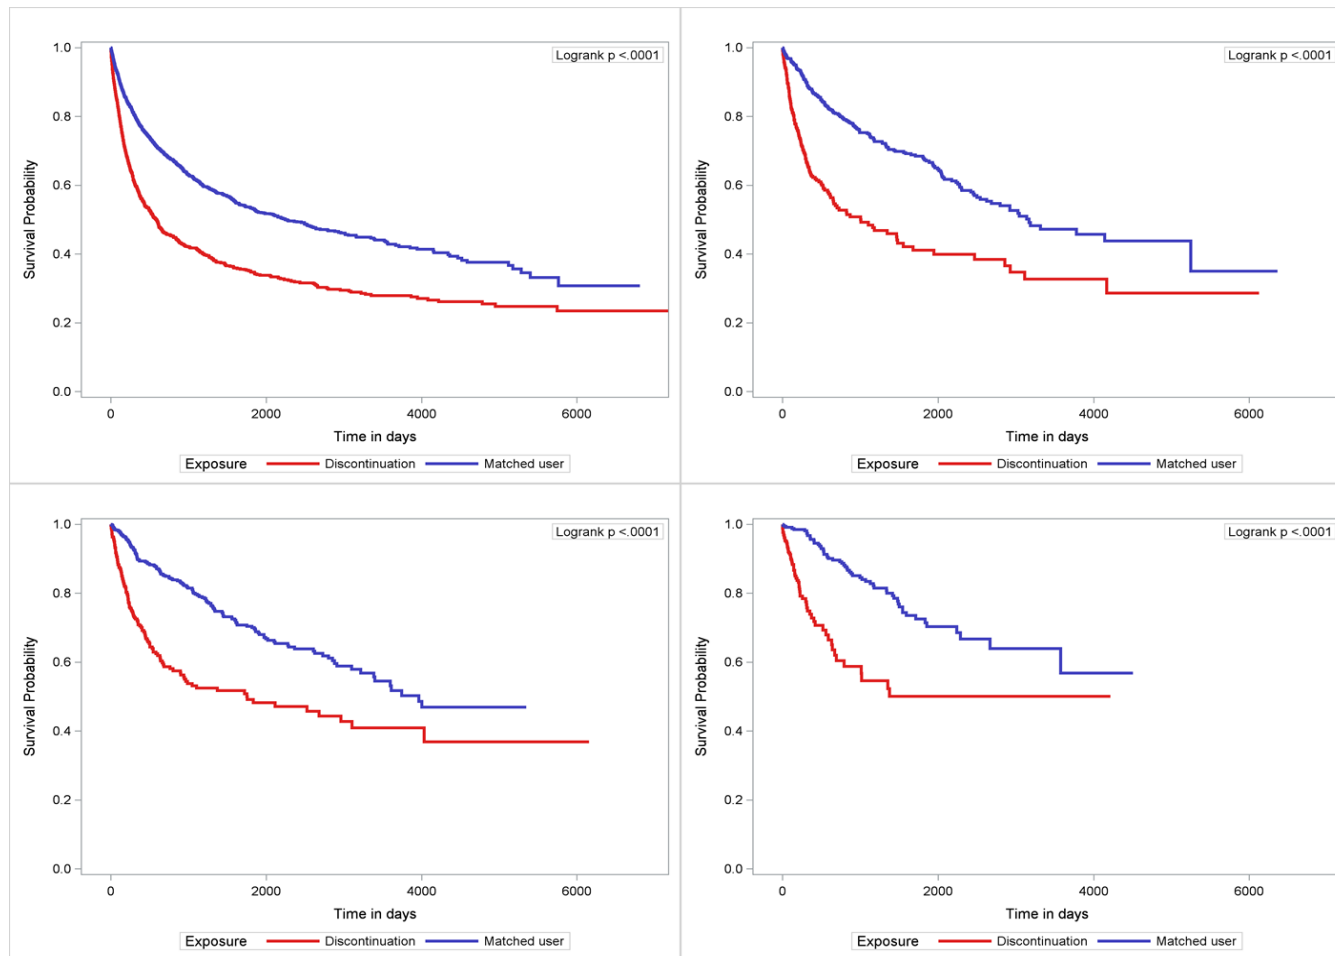

a) Discontinuation within <1 year of use, b) discontinuation after 1–<2 years of use, c) discontinuation after 2–<5 years of use, and d) discontinuation after ≥5 years of use (median 8.7 years, IQR 6.6–11.6 years).

**TABLE S1.** The risk of treatment failure (psychiatric re-hospitalization or death) after discontinuation of antipsychotic use compared with matched individuals who continue use of antipsychotic, including the whole incident cohort (N = 23,499) without washout period for antipsychotic use. The maximum follow-up after discontinuation was 20 years.

| <b>Discontinuation after stability in outpatient care (after discharge from the first hospital treatment)</b> | <b>N</b> | <b>Age at discontinuation (mean, SD)</b> | <b>Sex (% males)</b> | <b>Median (IQR) time of follow-up (days)</b> | <b>Events</b> | <b>Person-years</b> | <b>Incidence rate per 100 person-years (95% CI)</b> | <b>Age- and gender adjusted HR (95% CI)</b> |
|---------------------------------------------------------------------------------------------------------------|----------|------------------------------------------|----------------------|----------------------------------------------|---------------|---------------------|-----------------------------------------------------|---------------------------------------------|
| <b>Immediately</b>                                                                                            |          |                                          |                      |                                              |               |                     |                                                     |                                             |
| Non-users                                                                                                     | 4459     | 42.7 (19.5)                              | 57.8                 | 408 (120–1269)                               | 2661          | 12,528              | 21.2 (21.2–21.3)                                    | 1.27 (1.21–1.32)                            |
| Antipsychotic users                                                                                           | 15220    | 40.8 (16.7)                              | 51.6                 | 376 (97–1200)                                | 6839          | 39,067              | 17.5 (17.4–17.5)                                    | 1.00                                        |
| <b>&lt;1 year</b>                                                                                             |          |                                          |                      |                                              |               |                     |                                                     |                                             |
| Discontinuers                                                                                                 | 2563     | 37.9 (15.9)                              | 52.8                 | 122 (37–378)                                 | 1027          | 3393                | 30.3 (30.0–30.5)                                    | 1.97 (1.73–2.24)                            |
| Matched users                                                                                                 | 2563     | 41.3 (16.2)                              | 51.0                 | 509 (166–1350)                               | 979           | 6969                | 14.0 (13.9–14.1)                                    | 1.00                                        |
| <b>1-&lt;2 years</b>                                                                                          |          |                                          |                      |                                              |               |                     |                                                     |                                             |
| Discontinuers                                                                                                 | 710      | 35.7 (14.2)                              | 52.1                 | 134 (50–346)                                 | 215           | 763                 | 28.2 (27.8–28.6)                                    | 3.41 (2.45–4.75)                            |
| Matched users                                                                                                 | 710      | 42.6 (15.7)                              | 51.0                 | 809 (293–1884)                               | 218           | 2367                | 9.2 (9.1–9.3)                                       | 1.00                                        |
| <b>2-&lt;5 years</b>                                                                                          |          |                                          |                      |                                              |               |                     |                                                     |                                             |
| Discontinuers                                                                                                 | 722      | 35.9 (13.7)                              | 51.8                 | 133 (49–349)                                 | 185           | 891                 | 20.8 (20.5–21.1)                                    | 3.22 (2.25–4.60)                            |
| Matched users                                                                                                 | 722      | 42.8 (14.5)                              | 55.0                 | 887 (339–1820)                               | 188           | 2468                | 7.6 (7.5–7.7)                                       | 1.00                                        |
| <b>≥5 years (median 7.9 years)</b>                                                                            |          |                                          |                      |                                              |               |                     |                                                     |                                             |
| Discontinuers                                                                                                 | 352      | 37.9 (13.7)                              | 45.5                 | 124 (53–305)                                 | 73            | 349                 | 20.9 (20.5–21.4)                                    | 4.61 (2.23–9.50)                            |
| Matched users                                                                                                 | 352      | 46.9 (12.8)                              | 51.7                 | 809 (361–1571)                               | 64            | 1027                | 6.2 (6.1–6.4)                                       | 1.00                                        |

**TABLE S2.** The risk of psychiatric re-hospitalization after discontinuation of antipsychotic use compared with matched individuals who continue use of antipsychotic. The maximum follow-up time was 20 years.

| <b>Discontinuation after stability in outpatient care (after discharge from the first hospital treatment)</b> | <b>N</b> | <b>Events</b> | <b>Person-years</b> | <b>Incidence rate per 100 person-years (95% CI)</b> | <b>Age- and gender adjusted HR (95% CI)</b> |
|---------------------------------------------------------------------------------------------------------------|----------|---------------|---------------------|-----------------------------------------------------|---------------------------------------------|
| <b>Immediately</b>                                                                                            |          |               |                     |                                                     |                                             |
| Non-users                                                                                                     | 3217     | 1654          | 9,669               | 17.1 (17.0–17.2)                                    | 1.62 (1.51–1.74)                            |
| Antipsychotic users                                                                                           | 4217     | 1377          | 11,767              | 11.7 (11.6–11.8)                                    | 1.00                                        |
| <b>&lt;1 year</b>                                                                                             |          |               |                     |                                                     |                                             |
| Discontinuers                                                                                                 | 1019     | 420           | 1957                | 21.5 (21.3–21.7)                                    | 2.17 (1.74–2.70)                            |
| Matched users                                                                                                 | 1019     | 294           | 2900                | 10.1 (10.0–10.3)                                    | 1.00                                        |
| <b>1–&lt;2 years</b>                                                                                          |          |               |                     |                                                     |                                             |
| Discontinuers                                                                                                 | 284      | 88            | 382                 | 22.8 (22.3–23.3)                                    | 3.04 (1.73–5.33)                            |
| Matched users                                                                                                 | 284      | 82            | 915                 | 9.0 (8.8–9.2)                                       | 1.00                                        |
| <b>2–&lt;5 years</b>                                                                                          |          |               |                     |                                                     |                                             |
| Discontinuers                                                                                                 | 274      | 76            | 421                 | 18.1 (17.7–18.5)                                    | 2.87 (1.66–4.97)                            |
| Matched users                                                                                                 | 274      | 64            | 1123                | 5.7 (5.6–5.8)                                       | 1.00                                        |
| <b>≥5 years</b>                                                                                               |          |               |                     |                                                     |                                             |
| Discontinuers                                                                                                 | 137      | 33            | 139                 | 23.8 (23.0–24.7)                                    | 7.04 (2.07–23.97)                           |
| Matched users                                                                                                 | 137      | 27            | 465                 | 5.8 (5.6–6.0)                                       | 1.00                                        |

**TABLE S3.** The risk of psychiatric re-hospitalization after discontinuation of antipsychotic use compared with matched individuals who continue use of antipsychotic, with maximum follow-up time after discontinuation 20 years. The whole incident cohort (N = 23,499) without washout period for antipsychotic use was included.

| <b>Discontinuation after stability in outpatient care (after discharge from the first hospital treatment)</b> | <b>N</b> | <b>Events</b> | <b>Person-years</b> | <b>Incidence rate per 100 person-years (95% CI)</b> | <b>Age- and gender adjusted HR (95% CI)</b> |
|---------------------------------------------------------------------------------------------------------------|----------|---------------|---------------------|-----------------------------------------------------|---------------------------------------------|
| <b>Immediately</b>                                                                                            |          |               |                     |                                                     |                                             |
| Non-users                                                                                                     | 4459     | 2441          | 12,528              | 19.5 (19.4–19.6)                                    | 1.24 (1.18–1.30)                            |
| Antipsychotic users                                                                                           | 15220    | 6562          | 39,067              | 16.8 (16.7–16.8)                                    | 1.00                                        |
| <b>&lt;1 year</b>                                                                                             |          |               |                     |                                                     |                                             |
| Discontinuers                                                                                                 | 2563     | 970           | 3393                | 28.6 (28.4–28.8)                                    | 1.92 (1.68–2.19)                            |
| Matched users                                                                                                 | 2563     | 924           | 6969                | 13.3 (13.2–13.3)                                    | 1.00                                        |
| <b>1–&lt;2 years</b>                                                                                          |          |               |                     |                                                     |                                             |
| Discontinuers                                                                                                 | 710      | 208           | 763                 | 27.3 (26.9–27.6)                                    | 3.52 (2.51–4.94)                            |
| Matched users                                                                                                 | 710      | 204           | 2367                | 8.6 (8.5–8.7)                                       | 1.00                                        |
| <b>2–&lt;5 years</b>                                                                                          |          |               |                     |                                                     |                                             |
| Discontinuers                                                                                                 | 722      | 175           | 891                 | 19.6 (19.3–19.9)                                    | 3.07 (2.13–4.43)                            |
| Matched users                                                                                                 | 722      | 175           | 2468                | 7.1 (7.0–7.2)                                       | 1.00                                        |
| <b>≥5 years</b>                                                                                               |          |               |                     |                                                     |                                             |
| Discontinuers                                                                                                 | 352      | 68            | 349                 | 19.5 (19.0–20.0)                                    | 4.47 (2.17–9.21)                            |
| Matched users                                                                                                 | 352      | 60            | 1027                | 5.8 (5.7–6.0)                                       | 1.00                                        |

**TABLE S4.** Percentage of persons using clozapine or long-acting injectable (LAI) antipsychotics before time 0 (indicating start of follow-up for treatment failure and psychiatric re-hospitalization).

|                      | Clozapine use ever before time 0,<br>% (95% CI), N | LAI use ever before time 0,<br>% (95% CI), N |
|----------------------|----------------------------------------------------|----------------------------------------------|
| <b>&lt;1 year</b>    |                                                    |                                              |
| Discontinuers        | 9.1 (7.5–11.1), 93                                 | 12.4 (10.5–14.5), 126                        |
| Matched users        | 18.6 (16.4–21.2), 190                              | 14.4 (12.4–16.7), 147                        |
| <b>1-&lt;2 years</b> |                                                    |                                              |
| Discontinuers        | 8.1 (5.5–11.9), 23                                 | 15.8 (12.1–20.5), 45                         |
| Matched users        | 23.6 (19.0–28.9), 67                               | 10.2 (7.2–16.7), 29                          |
| <b>2-&lt;5 years</b> |                                                    |                                              |
| Discontinuers        | 14.2 (10.6–18.9), 39                               | 14.2 (10.6–18.9), 39                         |
| Matched users        | 26.3 (21.4–31.8), 72                               | 13.9 (10.3–18.5), 38                         |
| <b>≥5 years</b>      |                                                    |                                              |
| Discontinuers        | 13.1 (8.5–19.8), 18                                | 7.3 (4.0–12.9), 10                           |
| Matched users        | 22.6 (16.4–30.3), 31                               | 7.3 (4.0–12.9), 10                           |



**TABLE S5.** Risk of death between those discontinuing antipsychotic use <1 year of use, and compared with matched users and matched nonusers. The follow-up for mortality analyses was restricted to the first 6000 days due to sparsity of data, and because proportional hazards assumption did not hold after this time point. Due to very low number of events, HRs were not calculated for other discontinuation categories than the largest one (discontinuation <1 years of use).

|                                    | <b>N</b> | <b>Events</b> | <b>Person-years</b> | <b>Incidence rate per<br/>100 person-years<br/>(95% CI)</b> | <b>Age- and gender<br/>adjusted HR<br/>(95% CI)</b> |
|------------------------------------|----------|---------------|---------------------|-------------------------------------------------------------|-----------------------------------------------------|
| Matched non-user                   | 1019     | 49            | 2785                | 1.76 (1.71–1.81)                                            | 3.14 (1.29–7.68)                                    |
| Discontinuation <1 y               | 1019     | 26            | 1956                | 1.33 (1.28–1.38)                                            | 2.74 (1.09–6.89)                                    |
| Matched user                       | 1019     | 16            | 2900                | 0.55 (0.52–0.58)                                            | 1.00                                                |
| <b>1-&lt;2 years</b>               |          |               |                     |                                                             |                                                     |
| Discontinuers                      | 284      | 3             | 381                 | 0.79 (0.70–0.88)                                            |                                                     |
| Matched users                      | 284      | 11            | 915                 | 1.20 (1.14–1.27)                                            |                                                     |
| <b>2-&lt;5 years</b>               |          |               |                     |                                                             |                                                     |
| Discontinuers                      | 274      | 4             | 421                 | 0.95 (0.86–1.04)                                            |                                                     |
| Matched users                      | 274      | 8             | 1123                | 0.71 (0.66–0.76)                                            |                                                     |
| <b>≥5 years (median 7.9 years)</b> |          |               |                     |                                                             |                                                     |
| Discontinuers                      | 137      | 2             | 139                 | 1.44 (1.24–1.64)                                            |                                                     |
| Matched users                      | 137      | 0             | 465                 | na                                                          |                                                     |
