# Supplementary material for: 20-Year Nationwide Follow-Up Study on Discontinuation of Antipsychotic Treatment in First-Episode Schizophrenia
Source: Atypon-hosted journal article supplement (doi:10.1176/appi.ajp.2018.17091001), 2018-04-06
Supplement: correction.pdf [file correction.pdf]

## Correction

When the article “20-Year Nationwide Follow-Up Study on Discontinuation of Antipsychotic Treatment in First-Episode Schizophrenia,” by Jari Tiihonen, M.D., Ph.D., et al. (doi:10.1176/appi.ajp.2018.17091001) was published online on April 6, 2018, the total N for the study population was reported incorrectly in the abstract and the Method section. The article was reposted with the correct N of 8,719 on May 11, 2018.
